# Supplementary material
Source: PubMed Central journal article supplement (PMC11189818)

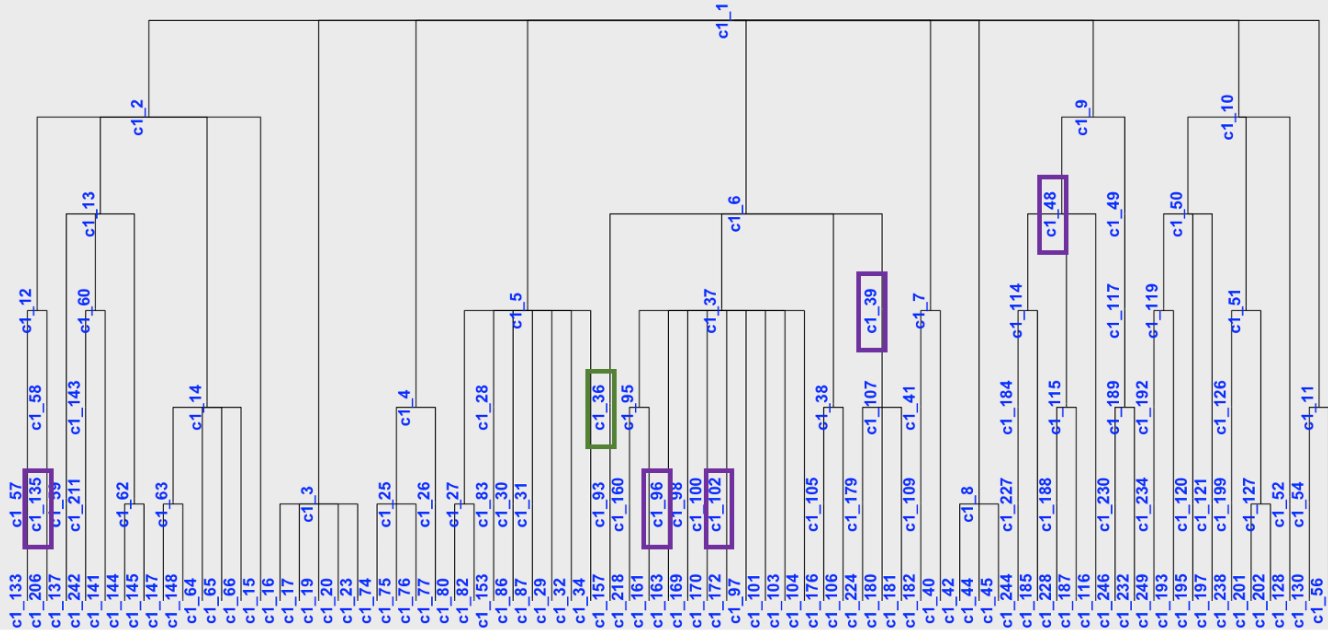

Supplement: 41380_2024_2420_MOESM8_ESM.pdf [file 41380_2024_2420_MOESM8_ESM.pdf]
